# Supplementary material for: Assessing the diversity of whiteflies infesting cassava in Brazil
Source: PeerJ journal article supplement (doi:10.7717/peerj.11741), 2021-07-15
Supplement: Xavier_et_al.,_Supplementary_Figure_S1.pdf [file Xavier_et_al.%2C_Supplementary_Figure_S1.pdf]

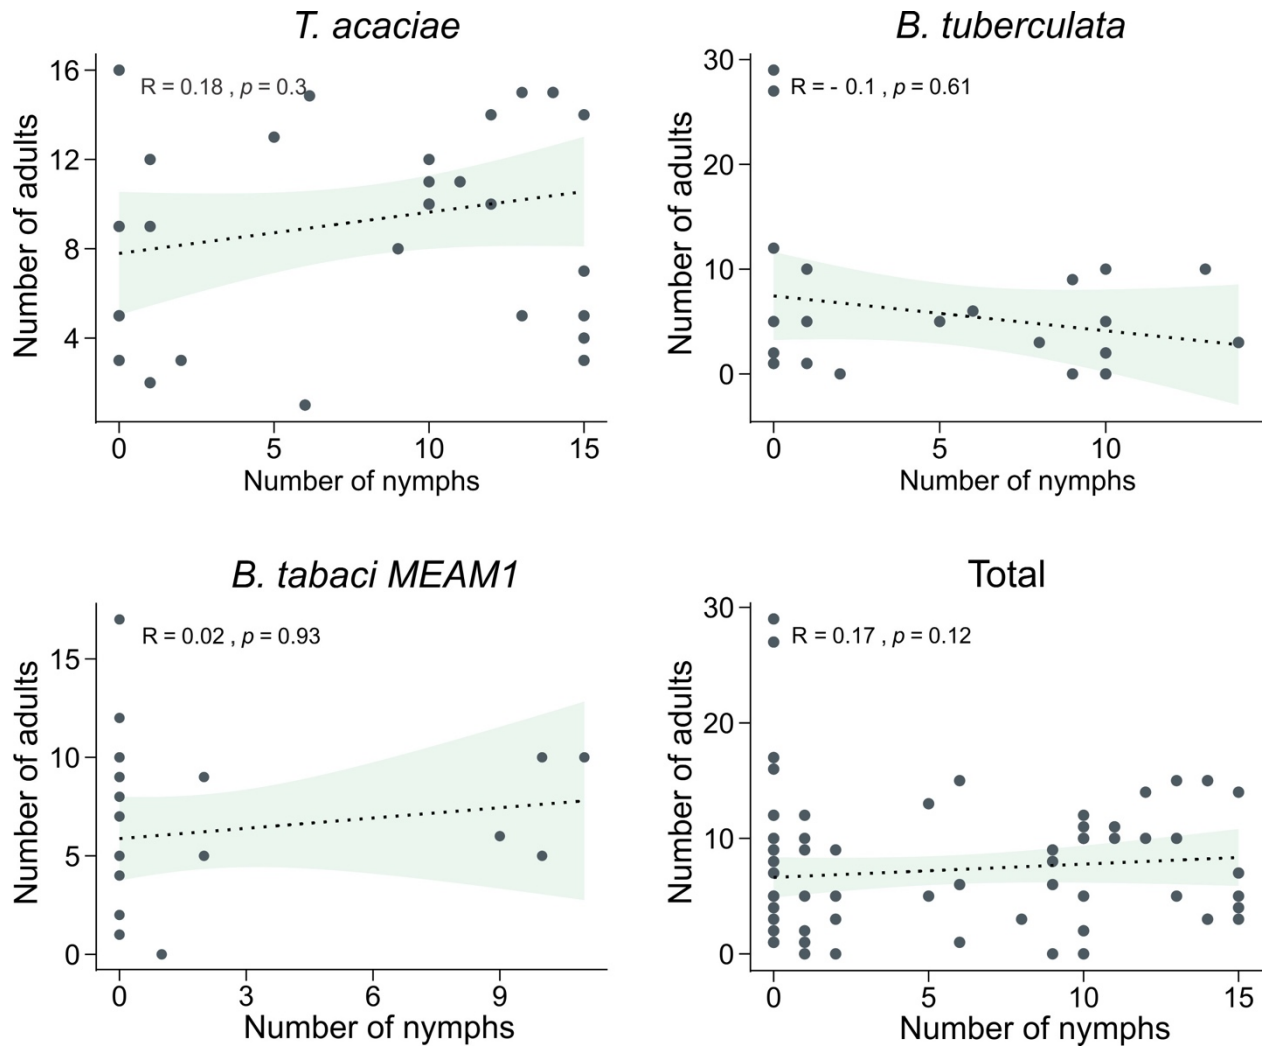

**Supplementary Figure S1.** Spearman's rank correlation coefficient analysis comparing number of nymphs and adults for the three more abundant whiteflies species. Each dot represent a sampled field. Only fields where nymphs and adults or where only one phase was observed were included in this analysis. Scatter plot showing 95% of confidence interval (light green) are shown. Total, correspond all three species plotted together.
